# Supplementary material for: Improving the photoelectrochemical and photocatalytic performance of CdO nanorods with CdS decoration
Source: Royal Society of Chemistry journal article supplement (doi:10.1039/c3ce40092a), 2013-01-01
Supplement: c3ce40092a.pdf [file c3ce40092a.pdf]

## Supporting information

### Improving Photoelectrochemical and Photocatalytic Performances of CdO Nanorods with CdS Decoration

Wei Li,<sup>a</sup> Mingyang Li,<sup>a</sup> Shilei Xie,<sup>a</sup> Teng Zhai,<sup>a</sup> Minghao Yu,<sup>a</sup> Chaolun Liang,<sup>a</sup>

Xingwang Ouyang,<sup>c</sup> Xihong Lu,<sup>a</sup> Haohua Li<sup>b\*</sup> and Yexiang Tong<sup>a\*</sup>

<sup>a</sup> KLGHEI of Environment and Energy Chemistry, MOE of the Key Laboratory of Bioinorganic and Synthetic Chemistry, School of Chemistry and Chemical Engineering, Sun Yat-Sen University, Guangzhou 510275, People's Republic of China E-mail: [chedhx@mail.sysu.edu.cn](mailto:chedhx@mail.sysu.edu.cn)

<sup>b</sup> Center for Photon Manufacturing Science and Technology, School of Materials Science and Engineering, Jiangsu University, Zhenjiang, 212013, P.R. China E-mail: [lihaohua@ujs.edu.cn](mailto:lihaohua@ujs.edu.cn)

<sup>c</sup> Guangdong University of Education Guangzhou 510303, People's Republic of China

### Experimental

**Preparation of CdO nanorods (NRs):** All reagents used were analytical grade and were used directly without any purification. All the electrodeposition experiments were carried out in a conventional three-electrode cell. The working electrode was an F-doped SnO<sub>2</sub> coated glass (FTO) with a sheet resistance of 14 Ω/cm<sup>2</sup>. A graphite rod of about 4.0 cm<sup>2</sup> was used as the auxiliary electrode. An Ag/AgCl electrode was used as the reference electrode. The FTO glass was cleaned ultrasonically in distilled water, ethanol, and acetone and then rinsed in distilled water again before electrodeposition. Firstly, Cd(OH)<sub>2</sub> NRs were grown on FTO substrate in a solution of 0.02 M Cd(NO<sub>3</sub>)<sub>2</sub> and 0.01 M ammonium chloride with a cathodic current density of 2.0 mA/cm<sup>2</sup> at

70 °C. After 30 min electrodeposition, a white film was obtained and washed by distilled water for several times. Then, CdO NRs was obtained by annealing the white film at 350 °C for 180 min in air. To obtain the CdO/CdS NRs, the prepared Cd(OH)<sub>2</sub> NRs were immersed into a 15 mL thioacetamide (0.01 M) aqueous solution for 15 and 30 min at room temperature and annealed at 350 °C in air for 180 min. the products were denoted as CdO/CdS-15min NRs and CdO/CdS-30min NRs, respectively.

**Materials characterizations:** The surface morphology, microstructure and the composition of the samples were analyzed by scanning electron microscope (SEM, Quanta 400), X-ray diffraction (XRD, Bruker, D8 ADVANCE) with Cu K $\alpha$  radiation ( $\lambda = 1.5418 \text{ \AA}$ ), transmission electron microscopy (TEM, JEM2010-HR) and X-ray Photoelectron Spectroscopy (XPS, ESCALab250). The optical properties of the samples were measured with a UV-Vis-NIR Spectrophotometer (UV, Shimadzu UV-3150).

**Photoelectrochemical characterizations:** PEC measurements were carried out in a three-electrode cell with a flat quartz window to facilitate illumination of the photoelectrode surface. The working electrode is the as-prepared film with a light irradiation area of 0.5 cm<sup>2</sup>, while a Pt wire as the counter electrode and an Ag/AgCl electrode as the reference electrode. The electrolyte is a Na<sub>2</sub>S-Na<sub>2</sub>SO<sub>3</sub> (0.1 M: 0.1 M) mixed aqueous solution. Linear sweeps were measured by a CHI 660D electrochemical station under visible light irradiation ( $\lambda \geq 420 \text{ nm}$ ) that provided by a Xe lamp (500 W, Beijing Changtuo, PLSLAX500) with a UV-cutoff filter. The intensity of light is about 100 mW/cm<sup>2</sup>.

**Photocatalytic measurements:** The photocatalytic degradation of methylene blue (MB) was carried out in an aqueous solution at room temperature. Typically, 50 mg of CdO or CdO@CdS

powder samples was suspended in 100 mL of 10 mg/L MB aqueous solution and magnetically stirred in the dark for 12 h to ensure establishment of an adsorption-desorption equilibrium before UV irradiation. Then, the powders were collected by filter and suspended in fresh MB solution (100 mL, 10 mg/L) for the photocatalytic degradation. The visible light source was provided by a 500 W Xe lamp (PLS-LAX500/1000, Beijing Changtuo) with UV-cutoff filter. The distance between the light and solution is about 5 cm. During irradiation process, constantly blowing air was necessary to ensure the system had enough oxygen. 3 mL of the suspensions was collected at different UV irradiation intervals and filtered through a 0.45  $\mu\text{m}$  membrane, and finally analyzed by a UV-vis spectrophotometer (UV-2450, Shimadzu) immediately.

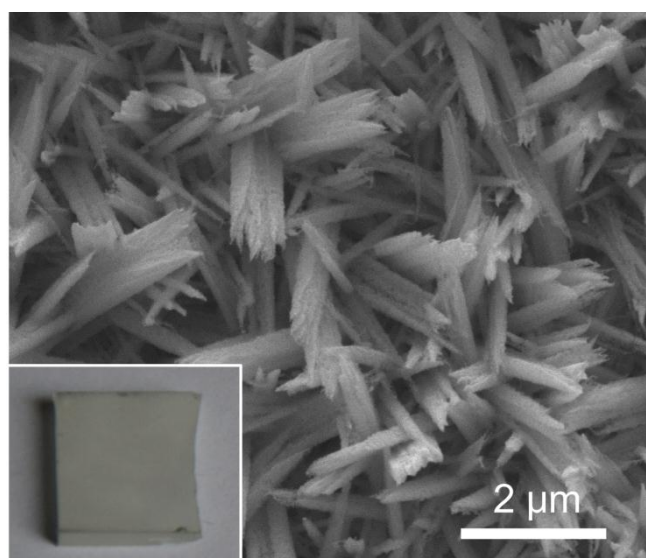

**Fig. S1** SEM image of  $\text{Cd}(\text{OH})_2$  NRs on FTO substrate. Inset: optical image of  $\text{Cd}(\text{OH})_2$  NR film.

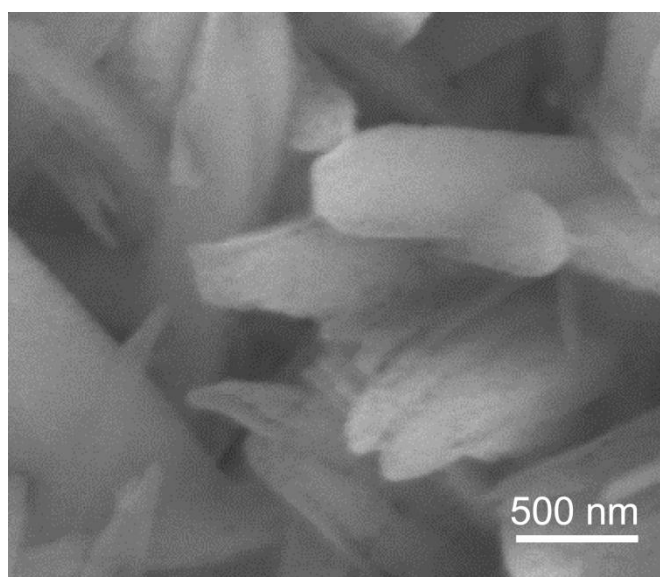

**Fig. S2** SEM image of CdO/CdS-15min NRs on FTO substrate.

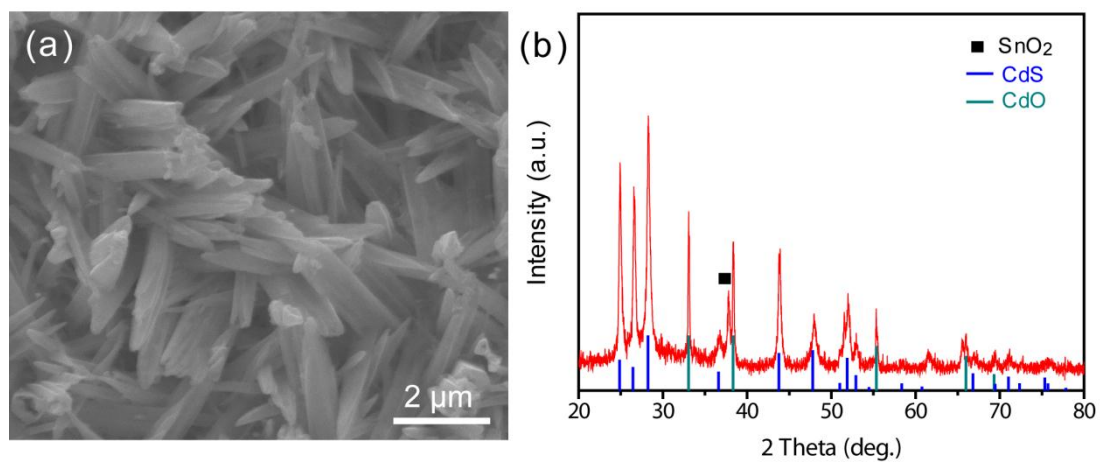

**Fig. S3** (a) SEM image and (b) XRD spectrum of CdO/CdS-30min NRs on FTO substrate.

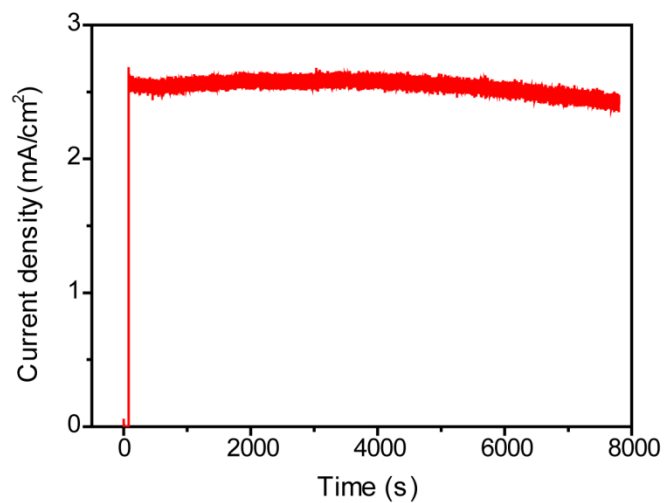

**Fig. S4** Photocurrent–time response curve of CdO/CdS heterostructured NRs collected at -0.4 V vs. Ag/AgCl in a Na<sub>2</sub>S (0.1 M) -Na<sub>2</sub>SO<sub>3</sub> (0.1 M) mixed solution under visible light irradiation (with a UV-cutoff filter,  $\lambda \geq 420$  nm).
